# Supplementary material for: Investigating the effect of fusion partners on the enzymatic activity and thermodynamic stability of poly(ethylene terephthalate) degrading enzymes
Source: Royal Society of Chemistry journal article supplement (doi:10.1039/d4fd00067f), 2024-01-01
Supplement: d4fd00067f1.pdf [file d4fd00067f1.pdf]

## Supplementary Information

# Investigating the effect of fusion partners on the enzymatic activity and thermodynamic stability of poly(ethylene terephthalate) degrading enzymes

Liliana Oliveira<sup>a</sup>, Alex Cahill<sup>a</sup>, Len Wuscher<sup>a</sup>, Kerry R. Green<sup>a</sup>, Victoria Bemmer<sup>a</sup>, and Bruce R. Lichtenstein<sup>a\*</sup>

<sup>a</sup> Centre for Enzyme Innovation, School of Biological Sciences, University of Portsmouth PO1 2UP

\*Corresponding author: [bruce.lichtenstein@port.ac.uk](mailto:bruce.lichtenstein@port.ac.uk)

## Table of Contents

|                                                                |    |
|----------------------------------------------------------------|----|
| SI.1. Gibson Assembly Protocol .....                           | 3  |
| SI.2. Construct Summary .....                                  | 4  |
| SI.3. Structural model of Enzyme-SpyCatcher003 construct ..... | 6  |
| SI.4. PET-Degrading Activity Data: Singular Plots .....        | 7  |
| SI.5. DSC Data Extended: Fits and Statistics.....              | 8  |
| SI.6. DSC Fits: $E_{act}$ vs $T_{act}$ Plots .....             | 9  |
| SI.7 References .....                                          | 10 |

## Sl.1. Gibson Assembly Protocol

- Materials:

Reaction buffers and master mixes stored at -70 °C.

5x Isothermal Reaction Buffer Mix

- 25% PEG-8000
- 500 mM Tris-HCl pH 7.5
- 50 mM MgCl<sub>2</sub>
- 50mM DTT
- 5mM NAD
- 1mM each of the four dNTPs

1.33x Gibson Master Mix

- Taq ligase (40 U/ul): 50 ul
- 5x Isothermal reaction buffer: 100 ul
- T5 exonuclease (1 U/ul): 2 ul
- Phusion polymerase (2 U/ul): 6.25 ul
- Nuclease-free water: 216.75 ul

- Protocol<sup>1</sup>:

1. PCR amplify vector and insert fragments, extract single bands from agarose gel using standard kit protocols
2. Add 5ul of purified PCR products to single aliquot of Gibson Master Mix.
  - Recommended: 100 ng of vector with 2x molar of insert (5x if insert < 200bp)
3. Incubate reaction mix at 50 °C for 15 minutes in thermocycler
4. Transform immediately into NEB 5-alpha chemical competent cells or store in the freezer.

## Sl.2. Construct Summary

| Construct            | Vector    | Expressed Protein Sequence (ORF)                                                                                                                                                                                                                                                                                                                                                                                                               |
|----------------------|-----------|------------------------------------------------------------------------------------------------------------------------------------------------------------------------------------------------------------------------------------------------------------------------------------------------------------------------------------------------------------------------------------------------------------------------------------------------|
| MBP-SpyTag           | pMAL-p4x  | MKTEEGKLVWINGDKGYNGLAIEVGGKFEKDTGIKVTVEHPDKLEEKFPQVAATGDGPDIIFWAHDRFGGYAQSGLLAEITPDKAFQDKLYPFTWDAVRYNGKLIAYPIAVEALSLIYNKDLLPNPPKTWEEIPALDKELKAKGKSALMFNLQEPYFTWPLIAADGGYAFKYENGGYDIKDVGVNDNAGAKAGLTFVLVDLIKHKHMNADTDYSIAEAAFNKGETAMTINGPWAWSNIDTSKVNYGVTVLPTFKGQPSKPFVGVLSAGINAASPNKELAKEFLENYLLDEGLEAVNKDKPLGAVALKSYYEELAKDPRIAATMENAQKGEIMPNIQMSAFWYAVRTAVINAASGRQTVDEALKDAQTNSSSNNNNNNNNNNLGIEGRISEFGSHHHHHHHHGNGENLYFQGSGRGVPHIVMVDAYKRYK* |
| Spycatcher003 ΔN1    | pET29a(+) | MDSATHIKFSKRDEDGRELAGATMELRDSSGKTISTWISDGHVKDFYLYPGKYTFVETAAPDGYEVATPIEFTVNEDGQVTVDGEATEGDAHTLEHHHHH*                                                                                                                                                                                                                                                                                                                                          |
| IsPETase             | pET21b(+) | MNFPRASRLMQAAVLGGLMAVSAAATAQTNPYARGPNPTAASLEASAGPFTVRSFTVSRPSGYGAGTVYYPTNAGGTGVAIAIVPGYTARQSSIKWWGPRLASHGFVVITIDTNSTLDQPSSRSSQMAALRQVASLNGTSSSPIYGVKVDTARMGVMGWSMGGGSLISAANNPSLKAAPQAPWDSSTNFSSVTVPTLIFACENDSIAPVNSSALPIYDSMSRNAKQFLEINGGSHSCANSGNSNQALIGKKGVAWMKRMDNDTRYSTFACENPNSTRVSDFRTANCSLEHHHHH*                                                                                                                                        |
| TfCut1               | pET21b(+) | MANPYERGNPTDALLEARSGPFSVSEENVSRLSASGFGGGTIYYPRENTYGAVAIISPGYTGTEASIAWLGERIASHGFVVITIDTITTLQDPDSRAEQLNAALNHMINRASSTVRSRIDSSRLAVMGHSMGGGSLRLASQRPDLKAAIPLTPWHLNKNWSSVRVPTLIIGADLDTIAPVLTHARPFYNSLPTSISKAYLELDGATHFAPNIPNKIIGKYSVAWLKRFVDNDTRYTQFLCPGPRDGLFGEVEEYRSTCPFLEHHHHH*                                                                                                                                                                   |
| LCCG <sup>ICCG</sup> | pET29a(+) | MSNPYQRGNPTRSALTADGPFVATYTVSRLSVSGFGGGVIYYPGTSLTFGGIAMSPGYTADASSLAWLGRRLASHGFVVLVINTNSRFDGPDSRASQLSAALNYLRTSSPSAVRARLDANRLAVAGHSMGGGGLTRIAEQNPSLKAAPLTPWHTDKTFNTSVPVLIVGAEADTVAPVSQHAIPFYQNLPSSTPKVYVELCNASHIAPNSNNAAISVYTISWMKLWVDNDTRYRQFLCNVNDPALCDFRTNNRHCQLEHHHHH*                                                                                                                                                                        |

|                             |           |                                                                                                                                                                                                                                                                                                                                                                                                                                                                       |
|-----------------------------|-----------|-----------------------------------------------------------------------------------------------------------------------------------------------------------------------------------------------------------------------------------------------------------------------------------------------------------------------------------------------------------------------------------------------------------------------------------------------------------------------|
| <i>IsPETase</i> -SC ΔN1     | pET29a(+) | <p>MNFPRASRLMQAAVLGGLMAVSAAATAQTNPYARGPNPTAASLEAS<br/> AGPFTVRSFTVSRPSGYGAGTVYYPTNAGGTVGAIAIVPGYTARQSSIK<br/> WWGPRLASHGFVVITIDTNSTLDQPSSRSSQMAALRQVASLNGTSS<br/> SPIYGKVD TARMGVMGWSMGGGGSLISAANNPSLKAAAPQAPWDS<br/> STNFSSVTVPTLIFACENDSIAPVNSSALPIYDSMSRNAKQFLEINGGSH<br/> SCANSGNSNQALIGKKGVAVWMKRMDNDTRYSTFACENPNSTRVSD<br/> FRTANCSGSGESGSGDSATHIKFSKRDEDGRELAGATMELRDSSGKTIS<br/> TWISDGHVKDFLYPGKYTFVETAAPDGYEVATPIEFTVNEDGQVTVD<br/> GEATEGDAHTLEHHHHHH*</p> |
| <i>TfCut1</i> -SC ΔN1       | pET29a(+) | <p>MANPYERGNPTDALLEARSGPFSVSEENVSRLSASGFGGGTIYYPREN<br/> NTYGAVAI SPGYTGTEASIAWLGERIASHGFVVITIDTITTLDPDSRAE<br/> QLNAALNHMINRASSTVRSRIDSSRLAVMGHSMGGGGSLRLASQRPD<br/> LKAAILTPWHLNKNWSSVRVPTLIIGADLDTIAPVLTHARPFYNSLPTS<br/> ISKAYLELDGATHFAPNIPNKIIGKYSVAWLKRFVDNDTRYTQFLCPGPR<br/> DGLFGEVEEYRSTCPFGSGESGSGDSATHIKFSKRDEDGRELAGATMEL<br/> RDSSGKTISTWISDGHVKDFLYPGKYTFVETAAPDGYEVATPIEFTVNE<br/> DGQVTVDGEATEGDAHTLEHHHHHH*</p>                                     |
| LCC <sup>ICCG</sup> -SC ΔN1 | pET29a(+) | <p>MSNPYQRGNPNTRSALTADGPFVATYTVSRLSVSGFGGGVIYYPTGTS<br/> LTFGGIAMSPGYTADASSLAWLGRRLASHGFVVLVINTNSRFDGPDSR<br/> ASQLSAALNYLRTSSPSAVRARLDANRLAVAGHSMGGGGTLRIAEQNP<br/> SLKAAVPLTPWHTDKTFNTSVPVLIVGAEADTVAPVSQHAIPFYQNLN<br/> STTPKVYVELCNASHIAPNSNNAAISVYTISWMKLWVDNDTRYRQFLC<br/> NVNDPALCDFRTNNRHCGSGESGSGDSATHIKFSKRDEDGRELAGA<br/> TMELRDSSGKTISTWISDGHVKDFLYPGKYTFVETAAPDGYEVATPIEF<br/> TVNEDGQVTVDGEATEGDAHTLEHHHHHH*</p>                                        |

\* TEV site highlighted in red, and native signal sequence in grey

### SI.3. Structural model of Enzyme-SpyCatcher003 construct

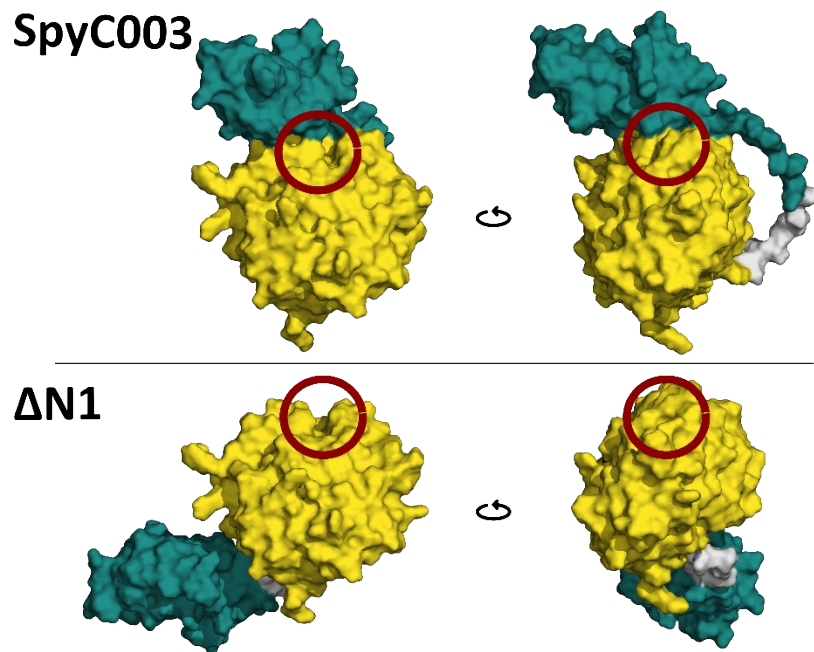

Full length SpyCatcher003 interferes with both expression and activity of PET hydrolase fusions. AlphaFold<sup>2,3</sup> models of TfCut1-SpyCatcher003, show the full length SpyCatcher003 domain (teal), with an extended N-terminal loop that wraps around the globular PETase (yellow) blocking the active site (red circle) (SpyC003, top). In the  $\Delta N1$  variation, the active site is unperturbed with SpyCatcher located on the opposite face of the active site cleft.

#### SI.4. PET-Degrading Activity Data: Singular Plots

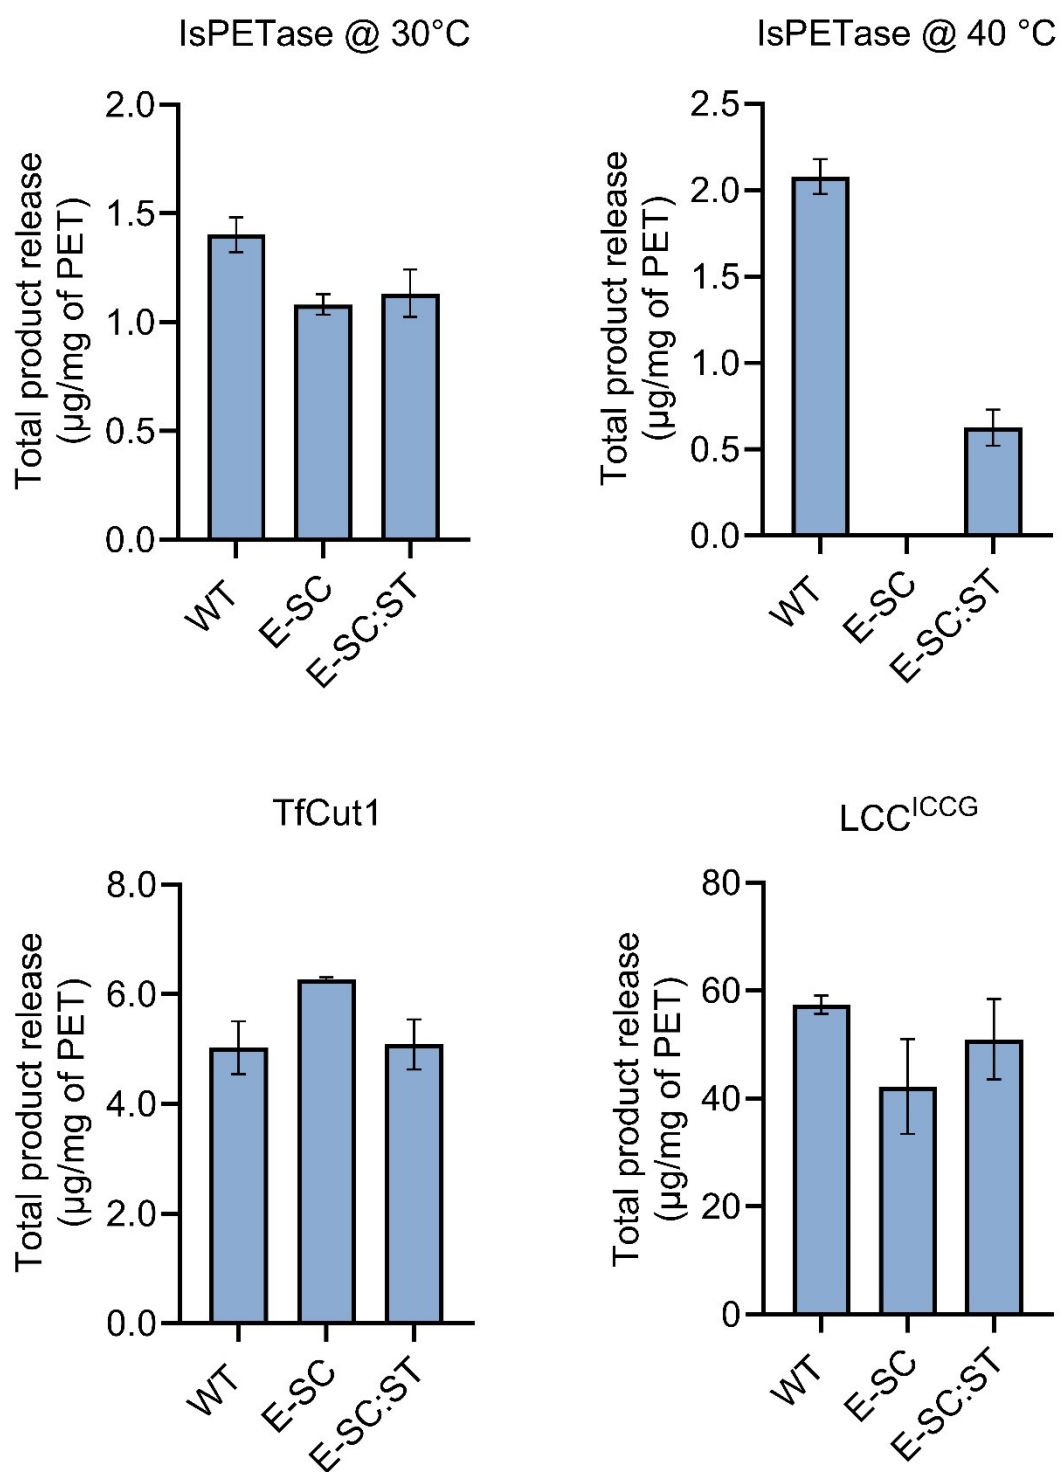

Total product released by enzymes acting on amorphous PET films. Error bars represent standard deviation. Reactions performed at 100 nM enzyme, for 25 hrs at 300 rpm and 100 mM NaCl. *IsPETase* was tested in 50 mM glycine pH 9.0 (both at 30 °C and 40 °C), *TfCut1* and LCC<sup>ICCG</sup> in 50 mM sodium phosphate pH 7.5 at 60 °C and 70 °C, respectively.

## SI.5. DSC Data Extended: Fits and Statistics

Table with extended model fits and associated statistics. Models were chosen based on F-ratios comparing the degrees of freedom (DOF) and sum of squares due to regression (SSR) of simpler models to more complex, as recommended for the Calfitter<sup>4</sup> server. F ratios close to 1 imply the simpler model is a better match to the data. Error bars represent 95% confidence intervals.

| Protein                 | Model                                      | $T_m/T_{act}$                                | $E_{act}$                                         | SSR     | DOF   | Chosen Model |
|-------------------------|--------------------------------------------|----------------------------------------------|---------------------------------------------------|---------|-------|--------------|
| SpyCatcher003           | N = D (Van't Hoff's)                       | 52.11 ± 0.02                                 | N/A                                               | 0.07214 | 14228 | *            |
| SpyCatcher003:SpyTag003 | N = D (Van't Hoff's)                       | 97.74 ± 0.03                                 | N/A                                               | 0.04513 | 4526  | *            |
| IsPETase                | N -> D                                     | 52.67 ± 0.04                                 | 189.45 ± 2.21                                     | 0.03446 | 5813  | *            |
| IsPETase-SC             | N -> D                                     | 48.58 ± 0.04                                 | 289.48 ± 3.52                                     | 0.15052 | 4660  |              |
| IsPETase-SC:ST          | N -> D                                     | 49.82 ± 0.21                                 | 149.13 ± 16.14                                    | 0.08245 | 2518  | *            |
| TfCut1                  | N -> D                                     | 77.79 ± 0.07                                 | 210.81 ± 4.01                                     | 0.11687 | 10365 | *            |
| TfCut1-SC               | N -> D                                     | 76.74 ± 0.14                                 | 237.79 ± 8.2                                      | 0.29323 | 3017  |              |
| TfCut1-SC:ST            | N -> D                                     | 78.46 ± 0.11                                 | 195.97 ± 5.13                                     | 0.07377 | 1553  | *            |
| ICCG                    | N -> D                                     | 95.40 ± 0.01                                 | 516.35 ± 3.56                                     | 0.02153 | 2285  | *            |
| ICCG-SC                 | N -> D                                     | 97.2 ± 0.02                                  | 561.15 ± 5.16                                     | 0.11353 | 4200  | *            |
| ICCG-SC:ST              | N -> D                                     | 97.04 ± 0.01                                 | 537.29 ± 2.63                                     | 0.04563 | 6283  |              |
| IsPETase-SC             | N = I -> D                                 | 38.62 ± 1.00<br>48.82 ± 0.05                 | N/A<br>223.17 ± 2.85                              | 0.10078 | 4658  |              |
| TfCut1                  | N = I -> D                                 | 66.33 ± 0.14<br>77.75 ± 0.05                 | N/A<br>234.38 ± 2.43                              | 0.08928 | 14733 |              |
| IsPETase-SC             | N -> I -> D                                | 46.93 ± 0.05<br>242.24 ± 785.31              | 359.55 ± 6.03<br>0.00 ± 14.8                      | 0.07378 | 4657  |              |
| TfCut1                  | N -> I -> D                                | 69.96 ± 0.58<br>76.50 ± 0.11                 | 331.22 ± 19.53<br>69.96 ± 0.58                    | 0.27457 | 3014  |              |
| TfCut1-SC:ST            | N -> I -> D                                | 75.07 ± 0.13<br>73.08 ± 4.82                 | 296.41 ± 7.88<br>24.43 ± 16.97                    | 0.03417 | 1550  |              |
| ICCG-SC:ST              | N -> I -> D                                | 93.47 ± 0.05<br>97.08 ± 0.01                 | 494.76 ± 7.62<br>524.91 ± 1.24                    | 0.0238  | 6280  | *            |
| IsPETase-SC             | N -> I <sub>1</sub> -> I <sub>2</sub> -> D | 44.54 ± 0.01<br>46.58 ± 0.05<br>47.45 ± 0.02 | 353.54 ± 5.39<br>338.61 ± 2.28<br>129.63 ± 7.84   | 0.3989  | 4654  | *            |
| TfCut1-SC               | N -> I <sub>1</sub> -> I <sub>2</sub> -> D | 75.84 ± 0.16<br>73.15 ± 0.17<br>79.07 ± 0.35 | 417.10 ± 25.82<br>382.81 ± 7.27<br>242.05 ± 10.61 | 0.27001 | 3013  | *            |



## SI.6. DSC Fits: $E_{act}$ vs $T_{act}$ Plots

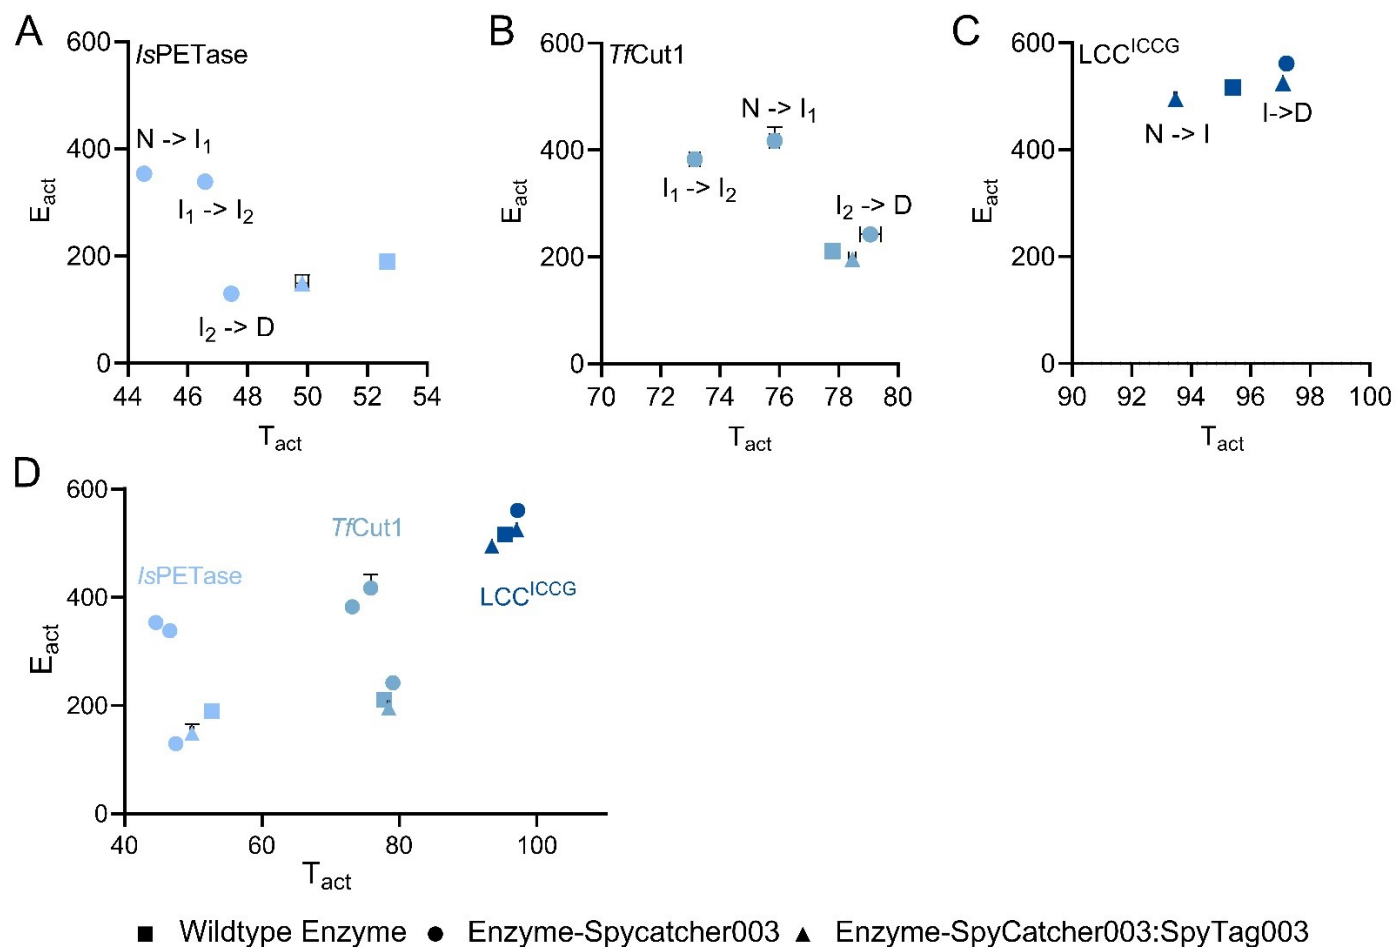

Comparison of  $T_{act}$  and  $E_{act}$  for enzymes and their fusions derived from the best fitting model for thermal denaturation in VSR-DSC. Wildtype enzymes are depicted as squares, enzyme-Spycatcher003 fusions as circles, and enzyme-SpyCatcher003:SpyTag003 as triangles. *IsPETase* (A) is coloured light-blue, *TfCut1* (B) blue, and *LCC<sup>ICCG</sup>* (C) dark blue. D shows a comparison between the three PETases and their fusions. Multistage unfolding mechanisms are indicated by N → I (native to intermediate), I → I (intermediate to intermediate), and I → D (intermediate to denatured). Horizontal and vertical error bars show 95% confidence intervals.

## Sl.7 References

- 1 D. G. Gibson, L. Young, R. Y. Chuang, J. C. Venter, C. A. Hutchison and H. O. Smith, *Nat Methods*, 2009, **6**, 343–345.
- 2 J. Jumper, R. Evans, A. Pritzel, T. Green, M. Figurnov, O. Ronneberger, K. Tunyasuvunakool, R. Bates, A. Žídek, A. Potapenko, A. Bridgland, C. Meyer, S. A. A. Kohl, A. J. Ballard, A. Cowie, B. Romera-Paredes, S. Nikolov, R. Jain, J. Adler, T. Back, S. Petersen, D. Reiman, E. Clancy, M. Zielinski, M. Steinegger, M. Pacholska, T. Berghammer, S. Bodenstein, D. Silver, O. Vinyals, A. W. Senior, K. Kavukcuoglu, P. Kohli and D. Hassabis, *Nature*, 2021, **596**, 583–589.
- 3 M. Mirdita, K. Schütze, Y. Moriwaki, L. Heo, S. Ovchinnikov and M. Steinegger, *Nat Methods*, 2022, **19**, 679–682.
- 4 S. Mazurenko, J. Stourac, A. Kunka, S. Nedeljković, D. Bednar, Z. Prokop and J. Damborsky, *Nucleic Acids Res*, 2018, **46**, W344–W349.
